# Supplementary material
Source: PubMed Central journal article supplement (PMC10879420)

***Supporting Information for:***

**Electrodeposited Gold on Carbon-Fiber Microelectrodes for Enhancing Amperometric Detection of Dopamine Release from Pheochromocytoma Cells**

Samuel T. Barlow, Matthew Louie, Rui Hao, Peter A. Defnet, and Bo Zhang\*  
Department of Chemistry, University of Washington, Seattle WA 98195-1700 United States

Corresponding author, email: zhangb@uw.edu, phone: (206) 543 1767 Fax: (206) 685 8665

*Table of Contents:*

Experimental Section

Table S1.  $E_{1/2}$  values for oxidation of dopamine on the CFEs before and after gold deposition.

Table S2. Spike characteristics collected using Pt-CFEs on PC12 cells.

Table S3. Spike characteristics collected from L-DOPA-treated PC12 cells.

Figure S1. Zoomed-in SEM image of Au-CFE from main-text, Figure 1B.

Figure S2. Example CVs of CFEs before and after deposition of Au in 0.1 mM dopamine, 1x PBS at each deposition voltage.

Figure S3. Example CVs of CFEs after deposition of Au in 0.5 M H<sub>2</sub>SO<sub>4</sub> at each deposition voltage.

Figure S4. Additional amperometric traces under control conditions.

Figure S5. Example amperometric traces from Pt-CFEs.

Figure S6. Pt-CFEs do not exhibit increased detection of catecholamine.

Figure S7. Interspike interval and average number of release events for control cells.

Figure S8. Interspike interval and average number of events for L-DOPA-treated cells.

Figure S9. No exocytotic peaks are observed in the absence of Ca<sup>2+</sup>.

## Experimental Section

*Additional Discussion of Table 2.* The number of cells measured for each probe sub-type are as follows:

Bare CFE = 18 cells, -0.3 V = 13 cells, -0.4 V = 16 cells, -0.5 V = 9 cells, -0.6 V = 13 cells.

*Electrodeposition of Platinum.* Pt was electrodeposited from 1 mM  $\text{PtCl}_4^-$ , 0.5 mM  $\text{H}_2\text{SO}_4$  onto beveled CFEs using a pulsed electrodeposition procedure.  $E_{\text{deposit}} = -1.6$  V was applied for 0.2 s, then  $E_{\text{rest}} = 0$  V was applied for 0.8 s to allow new metal ions to diffuse to the surface of the CFE. This was repeated for 75 cycles. Quartile potentials  $E_{1/4}$ ,  $E_{1/2}$ ,  $E_{3/4}$ , were extracted from dopamine CVs using a custom-written algorithm. Electrochemical surface area (ECSA) and surface roughness factor,  $\rho$ , were extracted from CV scans in 0.5 M  $\text{H}_2\text{SO}_4$  by finding the area under the gold oxide reduction wave.

*Ca<sup>2+</sup>-free Experiment.* Ca<sup>2+</sup>-free media was prepared to test whether Au-CFEs detected intracellular vesicles via VIEC. Ca<sup>2+</sup>-free saline was: 150 mM NaCl, 5 mM KCl, 1.2 mM  $\text{MgCl}_2 \cdot 6\text{H}_2\text{O}$ , 5 mM glucose, 10 mM HEPES, and 0.5 mM EGTA (ethylene glycol-bis( $\beta$ -aminoethyl ether)-N,N,N',N'-tetraacetic acid). Electrodes were lowered gently onto cells and perfused with a Ca<sup>2+</sup>-free stimulation solution to mimic the normal experiment. Cells were measured for 30 seconds in this manner before moving onto the next cell. 3 probes of each subtype were used to measure 10-12 cells. No events were observed in the absence of Ca<sup>2+</sup>.

**Table S1.**  $E_{1/2}$  values for oxidation of dopamine on the CFEs before and after gold deposition.

| $E_{deposit}$ (V) | # Electrodes | $E_{1/2}$ before Au (mV) | $E_{1/2}$ after Au (mV) |
|-------------------|--------------|--------------------------|-------------------------|
| -0.3              | 13           | 155±9.6                  | 84.7±12.5               |
| -0.4              | 14           | 159±15.8                 | 90.1±11.3               |
| -0.5              | 10           | 174±19.8                 | 66.1±14.2               |
| -0.6              | 10           | 157±19.9                 | 81.9±19.9               |

**Table S2.** Spike Characteristics collected using Pt-CFEs on PC12 cells. \* is  $p < 0.05$ , \*\* is  $p < 0.01$ .

| Electrode | Cells | # events | $I_{max}$ (pA) | $t_{1/2}$ (ms) | $t_{rise}$ (ms) | $t_{fall}$ (ms) | $N_{molecules}/10^3$ |
|-----------|-------|----------|----------------|----------------|-----------------|-----------------|----------------------|
| CFE       | 7     | 869      | 16.7±2.7       | 1.03±0.1       | 0.78±0.08       | 1.81±0.21       | 95.9±12.9            |
| Pt-CFE    | 7     | 599      | 18.7±3.0       | 0.83±0.08*     | 0.69±0.06       | 1.26±0.18**     | 76.1±9               |

**Table S3.** Spike Characteristics collected from L-DOPA incubated PC12 cells. \* is  $p < 0.01$ , \*\* is  $p < 0.0001$ .

| Electrode  | # Cells | Events | $I_{max}$ (pA) | $t_{1/2}$ (ms) | $t_{rise}$ (ms) | $t_{fall}$ (ms) | $N_{molecules}/10^3$ |
|------------|---------|--------|----------------|----------------|-----------------|-----------------|----------------------|
| Bare CFE   | 17      | 1768   | 11.7±1.1       | 1.79±0.11      | 1.30±0.07       | 3.04±0.27       | 135±10.2             |
| Au (-0.4V) | 13      | 1438   | 32.1±2.0**     | 1.69±0.21      | 1.36±0.16       | 2.73±0.43       | 199±19.2*            |

**Figure S1.** Zoomed in SEM image of the Au-CFE from Main-text, Figure 1B.

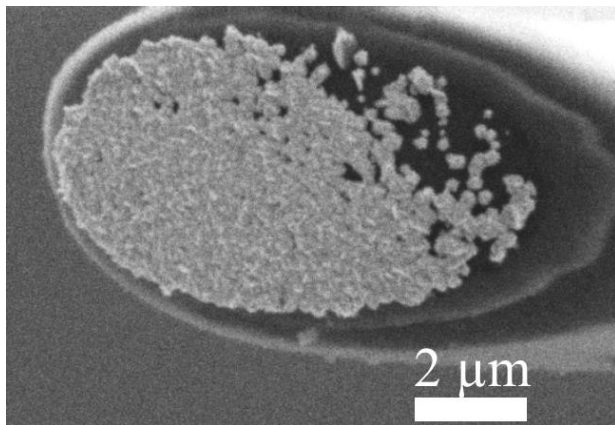

**Figure S2.** CVs in 0.1 mM dopamine, 1x PBS before (black) and after (gold) Au deposition. A)  $E_{deposit} = -0.3$  V, B)  $-0.4$  V, C)  $-0.5$  V, D)  $-0.6$  V.

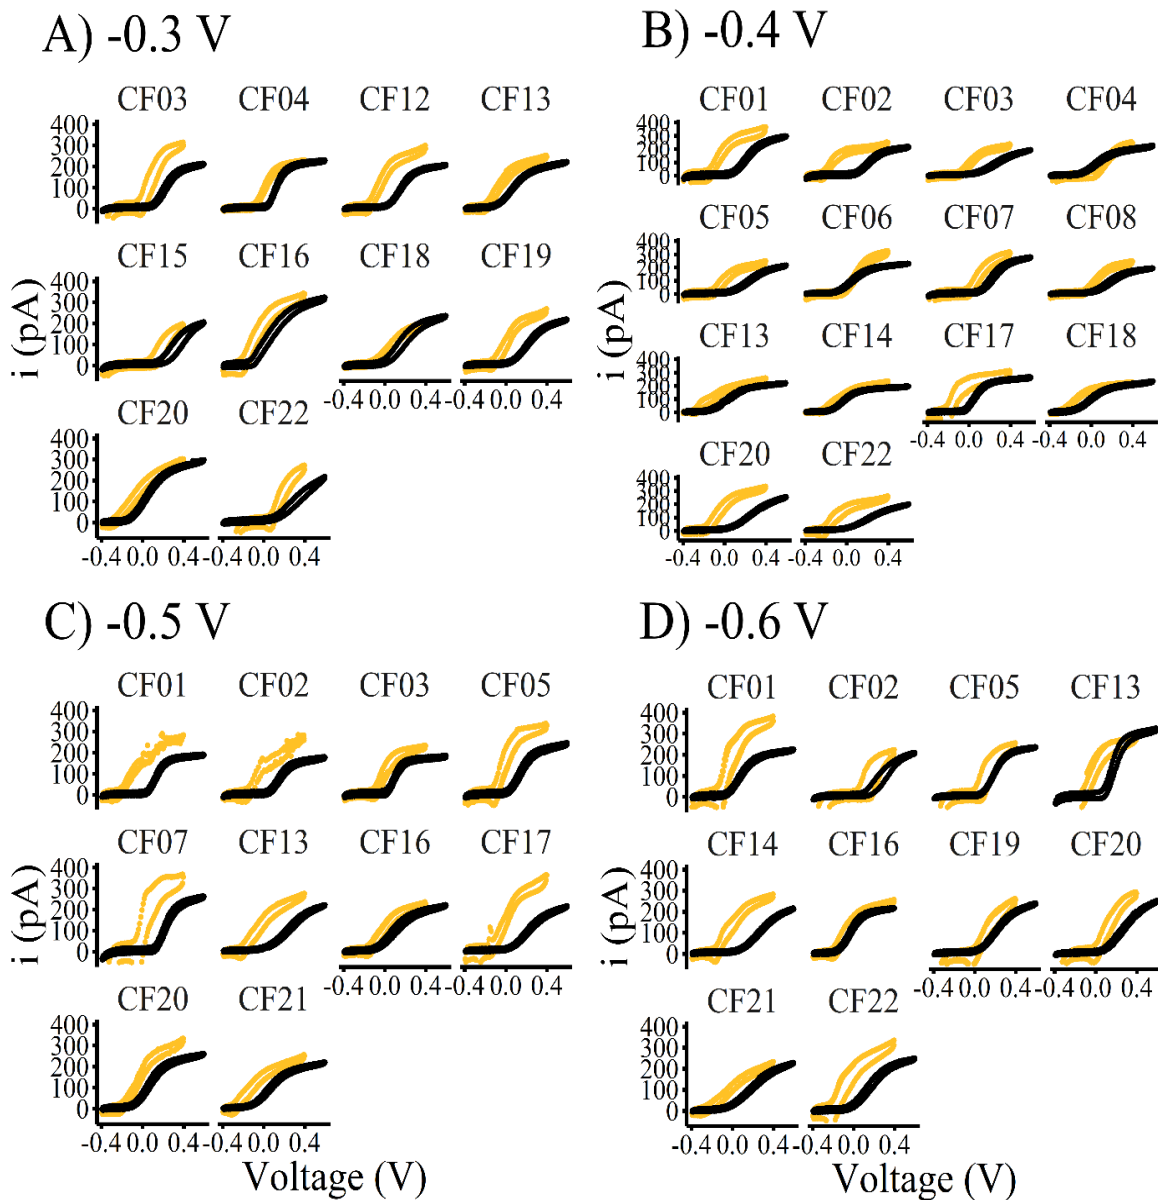

**Figure S3.** CVs in 0.5 M H<sub>2</sub>SO<sub>4</sub> after Au deposition. A)  $E_{deposit} = -0.3$  V, B)  $-0.4$  V, C)  $-0.5$  V, D)  $-0.6$  V.

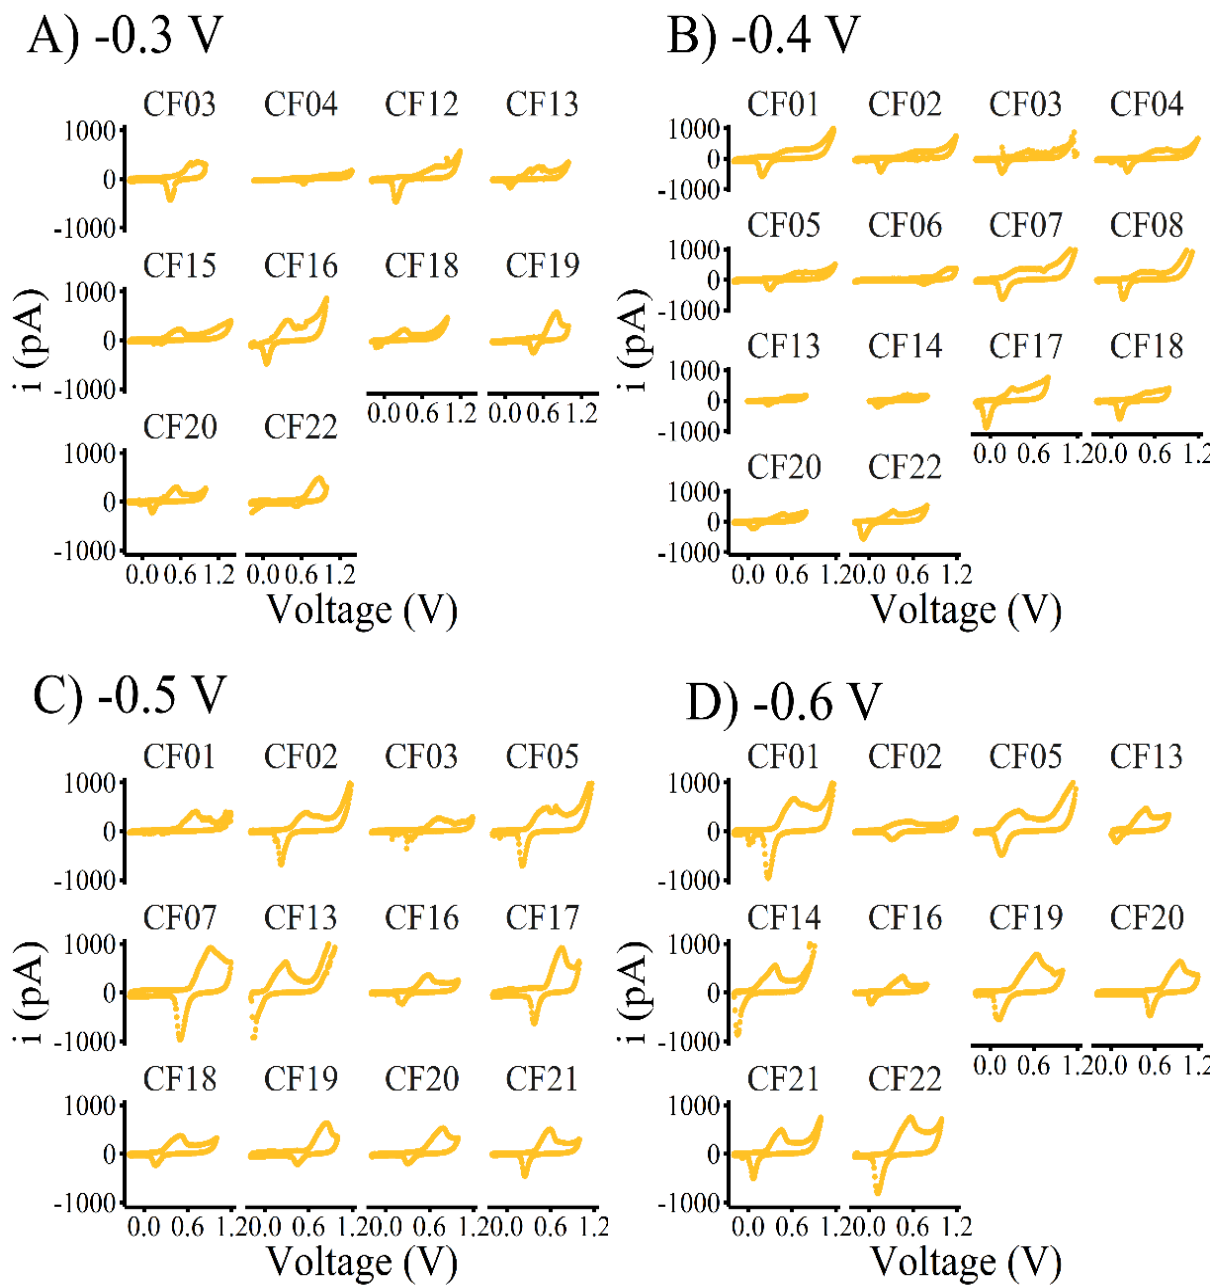

**Figure S4.** Additional amperometric traces at different  $E_{deposit}$  conditions. A) Unmodified, bare CFEs, B) -0.3 V, C) -0.4 V, D) -0.5 V, and E) -0.6 V.

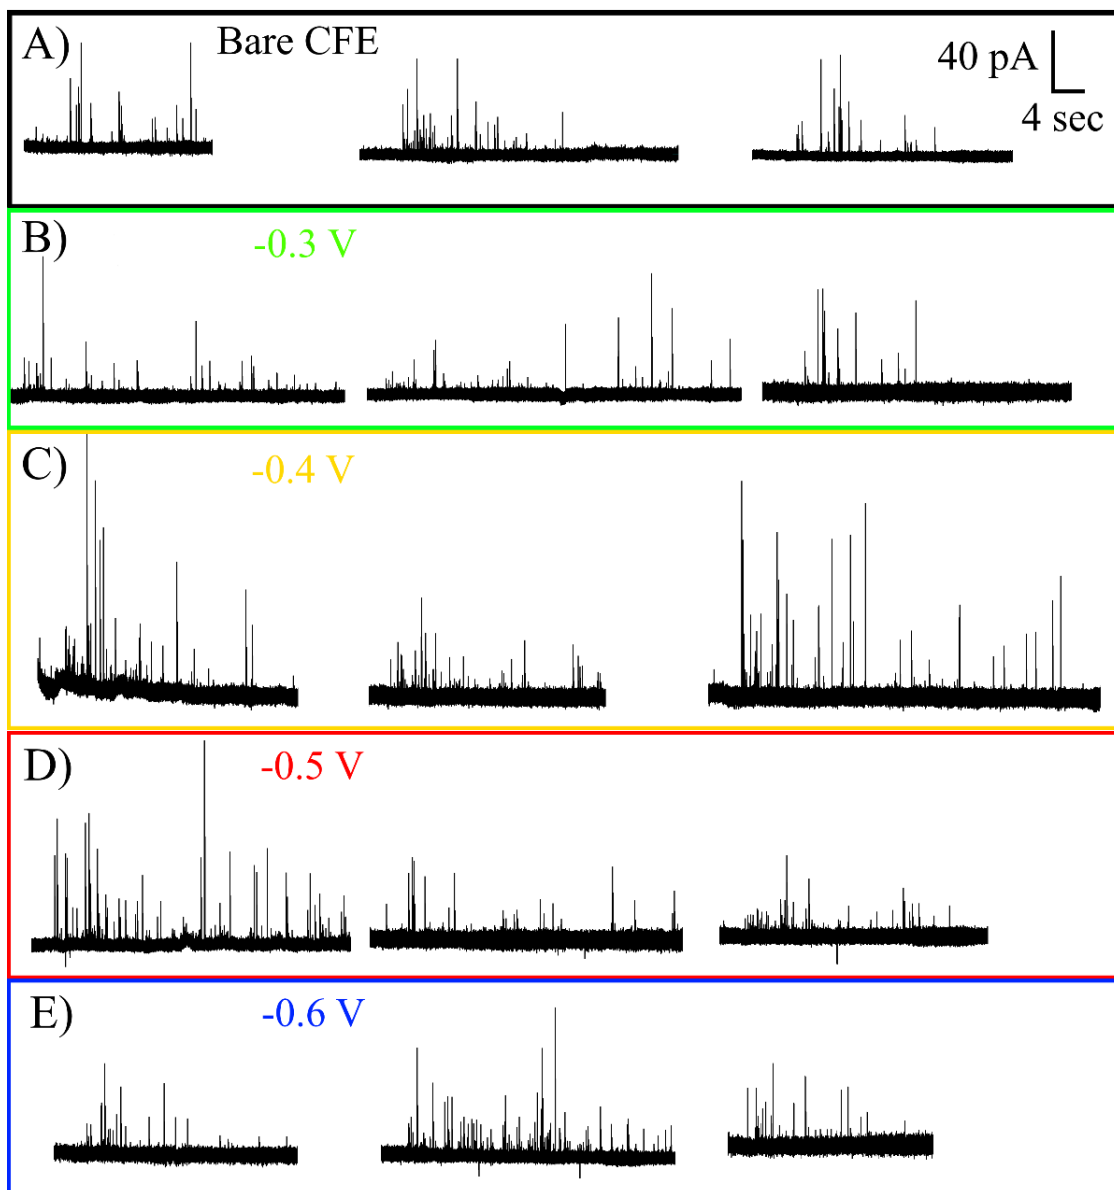

**Figure S5.** Example amperometric traces for Pt-CFEs on PC12 cells.

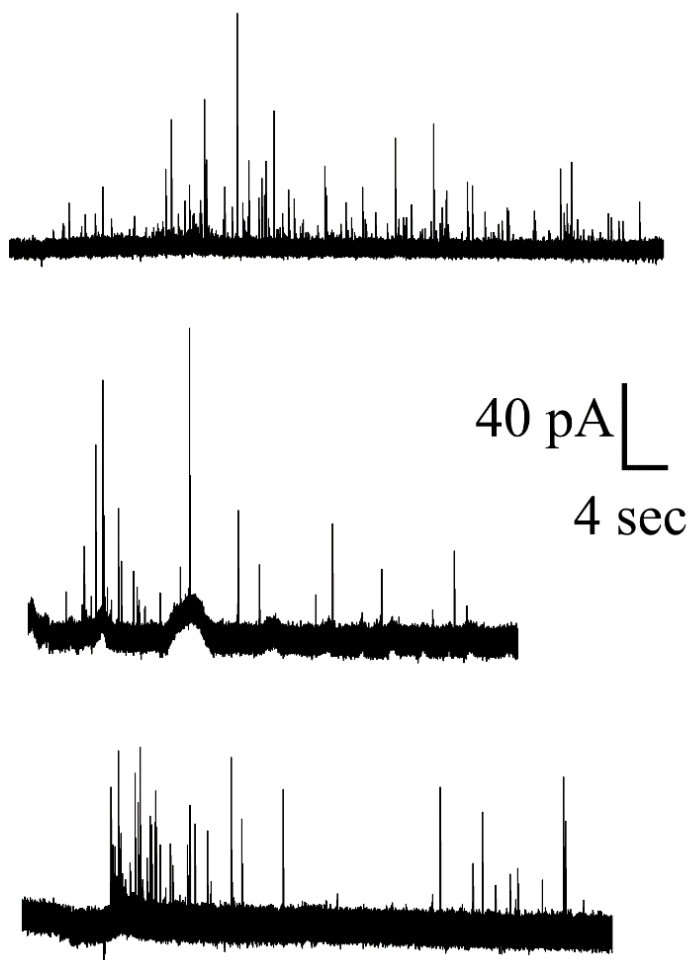



**Figure S6.** Pt-CFEs do not observe the same increased catecholamine release. A) Cumulative distributions of number of molecules released show no difference (KS-test,  $p > 0.05$ ) in events detected with Bare CFEs vs Pt-CFEs. B) Normalized frequency histograms of number of molecules released. C) Normalized frequency histograms of the cube root of number of molecules released may be fit by a gaussian.

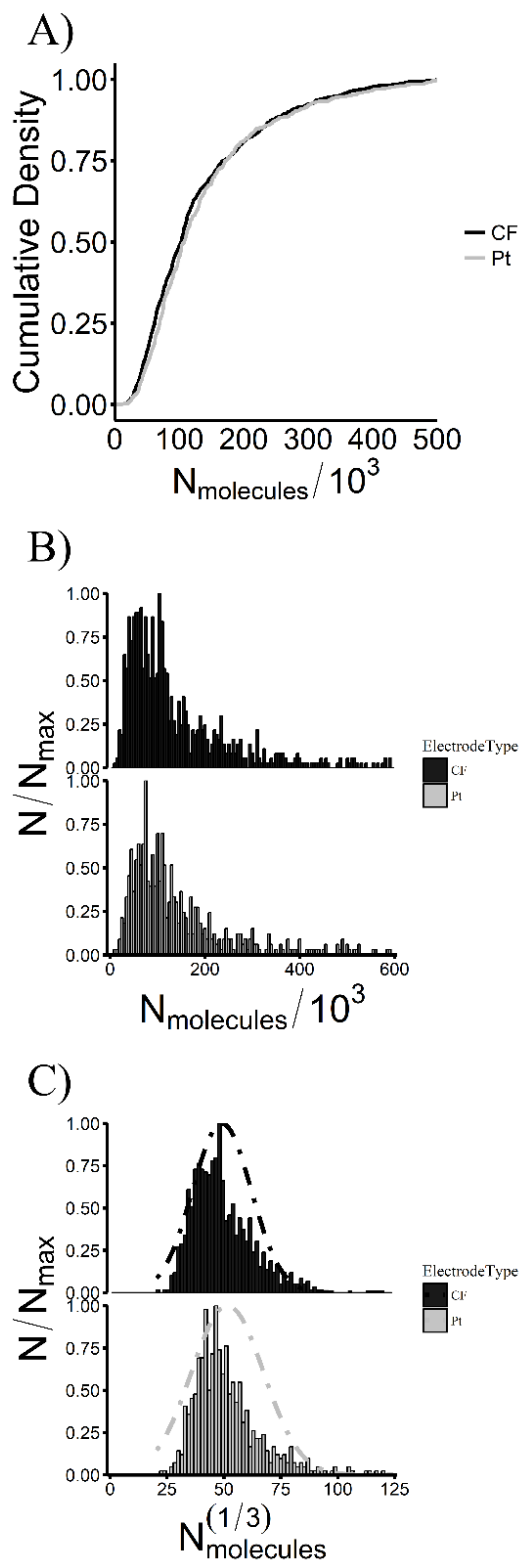

**Figure S7.** Addition of Au does not change bulk exocytosis properties. A) Average number of events recorded per cell with different probes. B) Average interspike interval (ms) for events recorded with different probes.

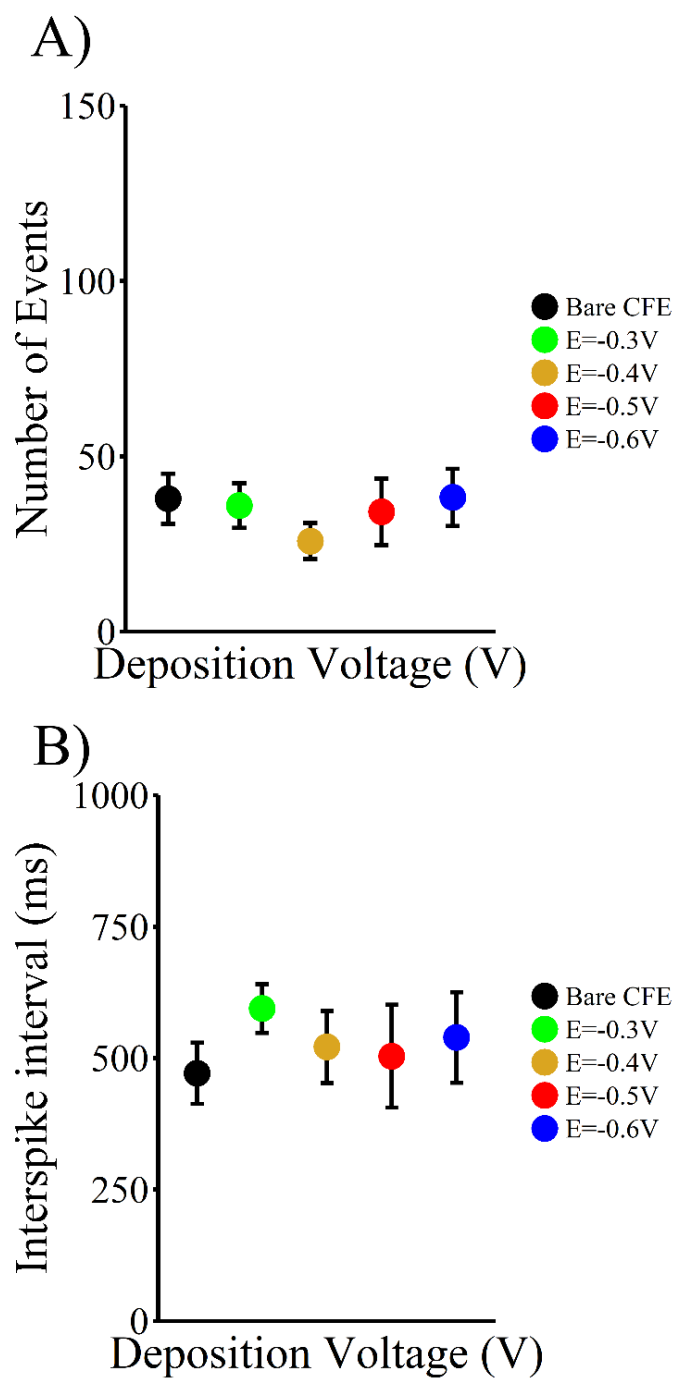

**Figure S8.** Addition of Au does not change observed bulk exocytosis properties in cells pre-treated with L-DOPA. A) Average number of events recorded per cell with different probes. B) Average interspike interval (ms) for events recorded with different probes.

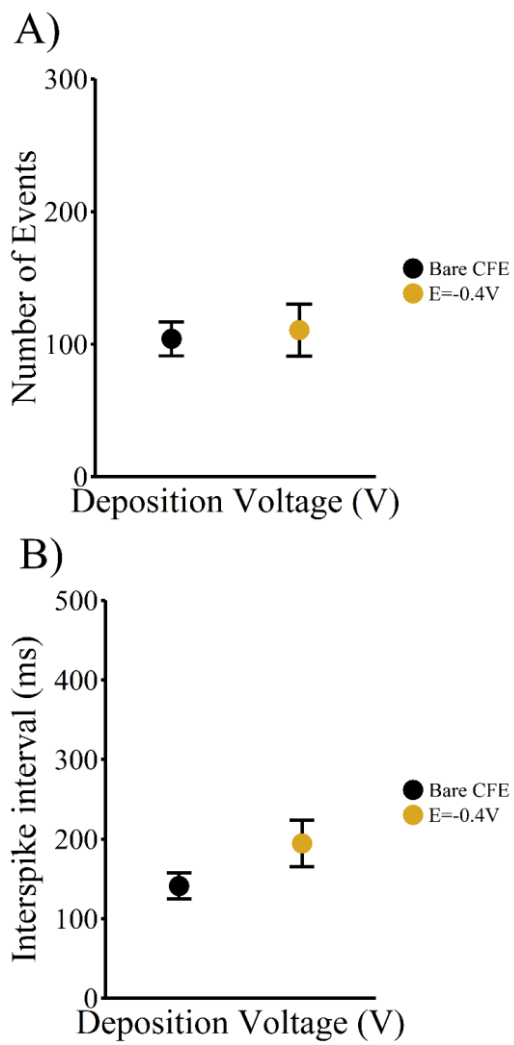

**Figure S9.** No peaks are detected in the absence of  $\text{Ca}^{2+}$ . A) unmodified CFE, B) -0.3 V, C) -0.4 V, D) -0.5 V, and E) -0.6 V.

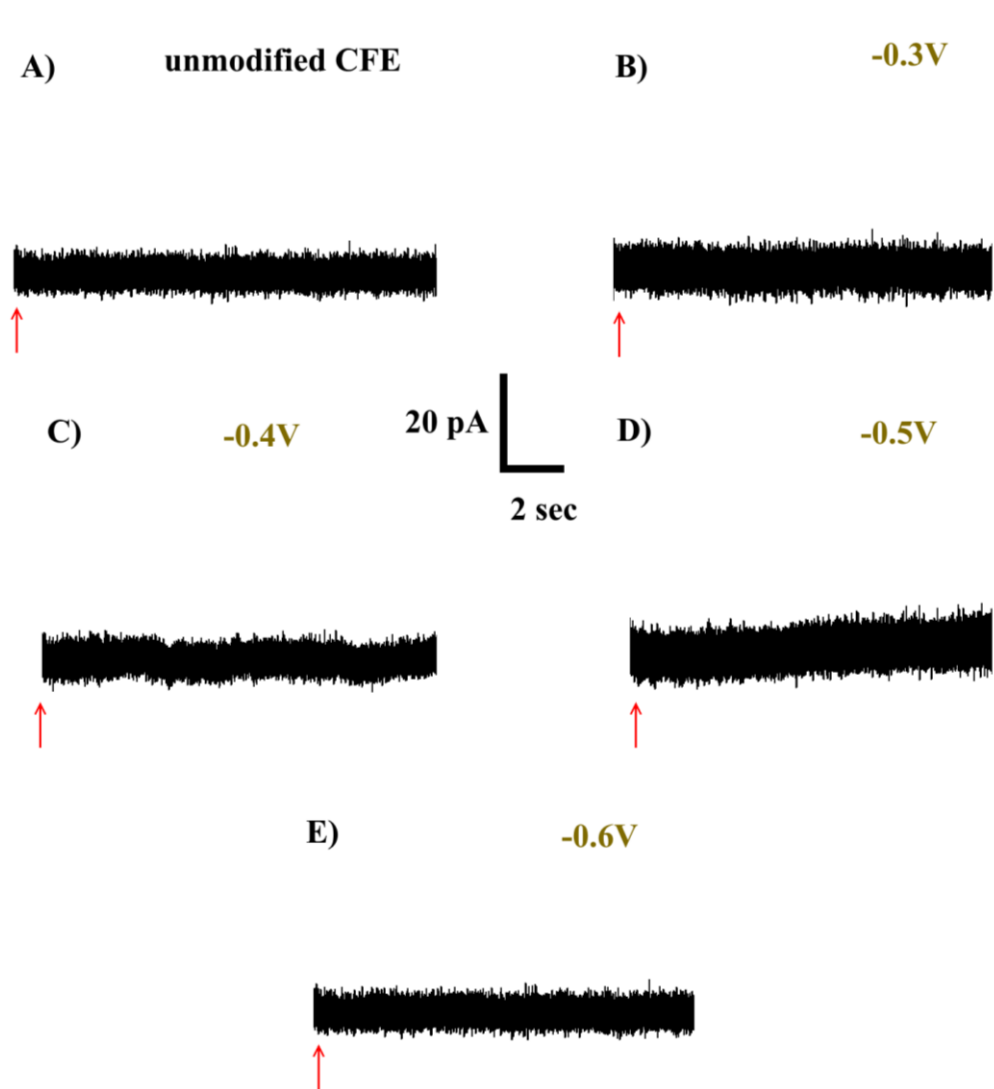

Supplement: NIHMS1965275-supplement-Supplementary_file.pdf [file NIHMS1965275-supplement-Supplementary_file.pdf]
